# Supplementary figures and images for: Dynamic Translational Landscape Revealed by Genome-Wide Ribosome Profiling under Drought and Heat Stress in Potato
Source: MDPI journal article supplement (doi:10.3390/plants12122232), 2023-06-06

a)

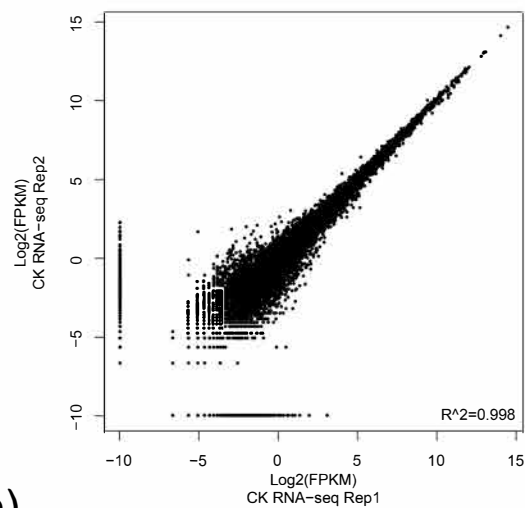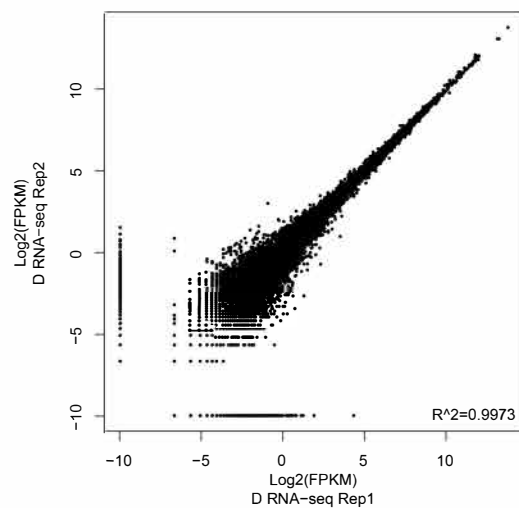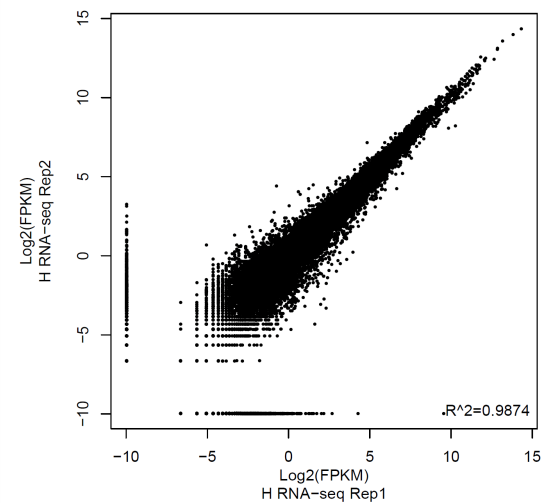

b)

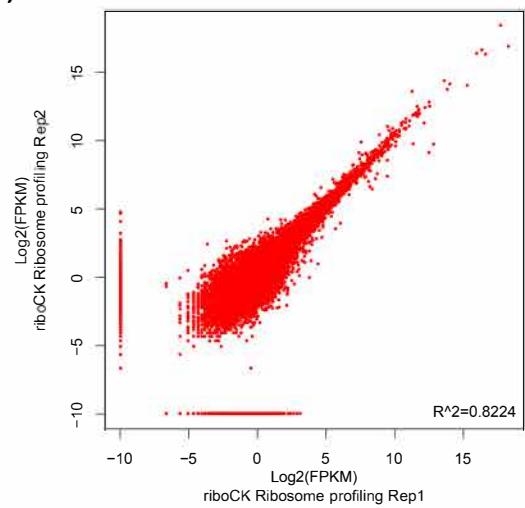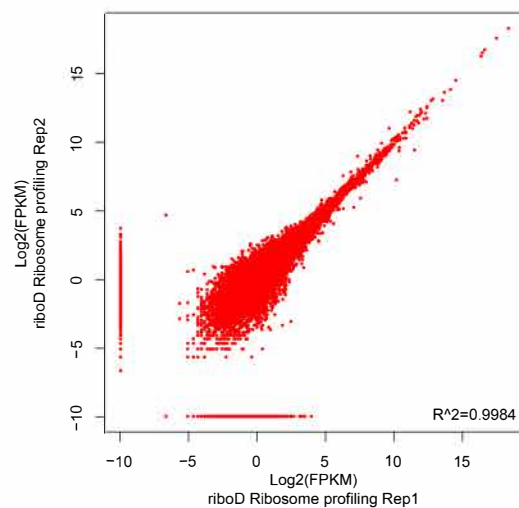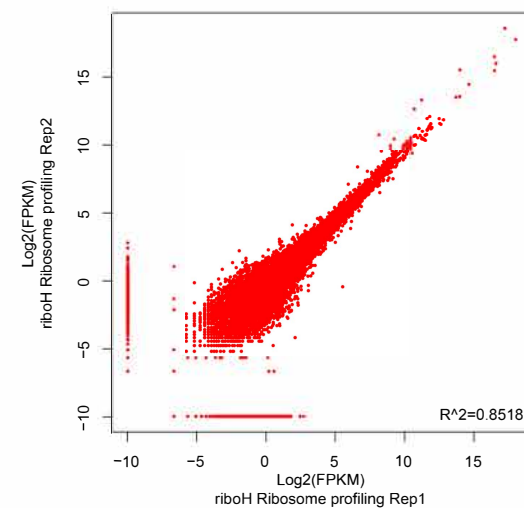

Supplement: s1 [file s1]

a)

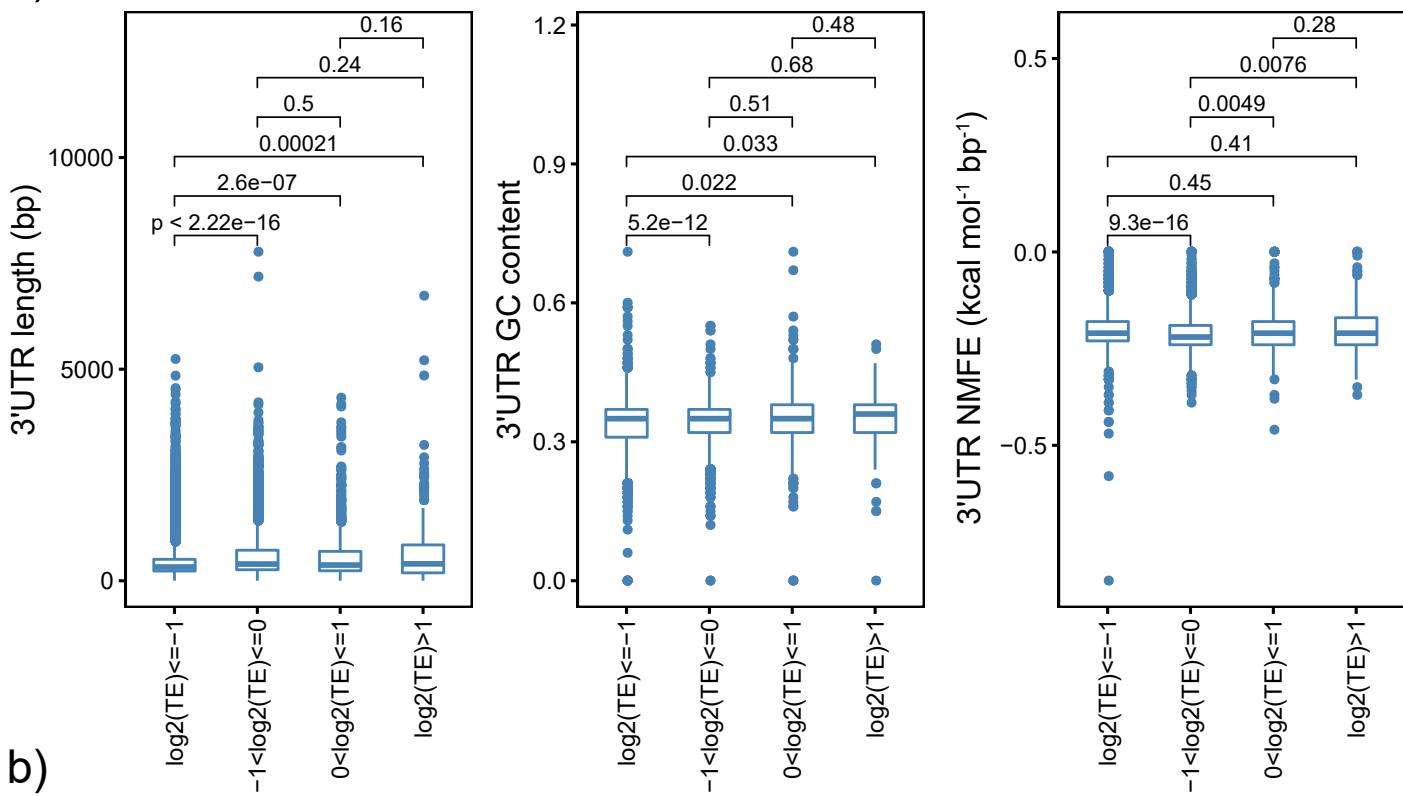

b)

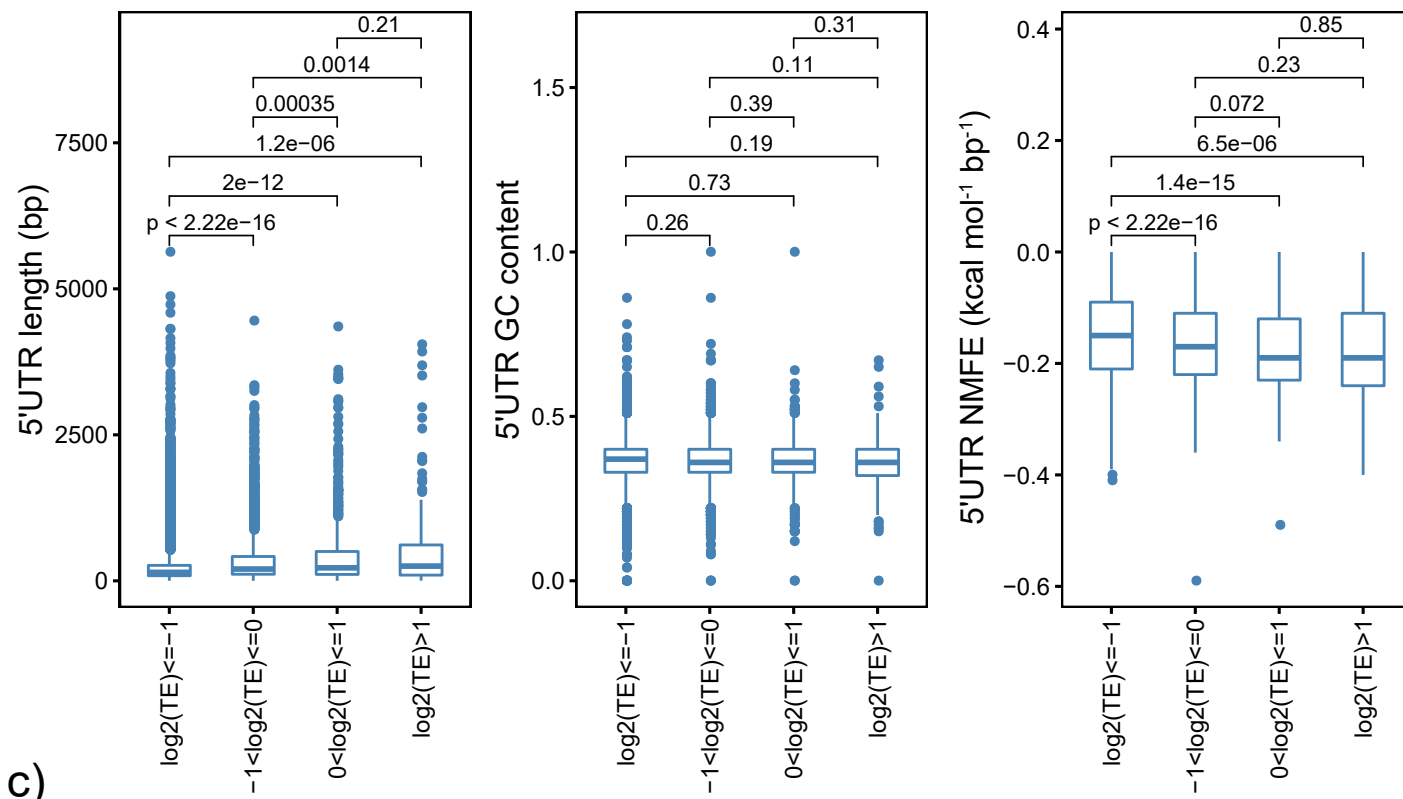

c)

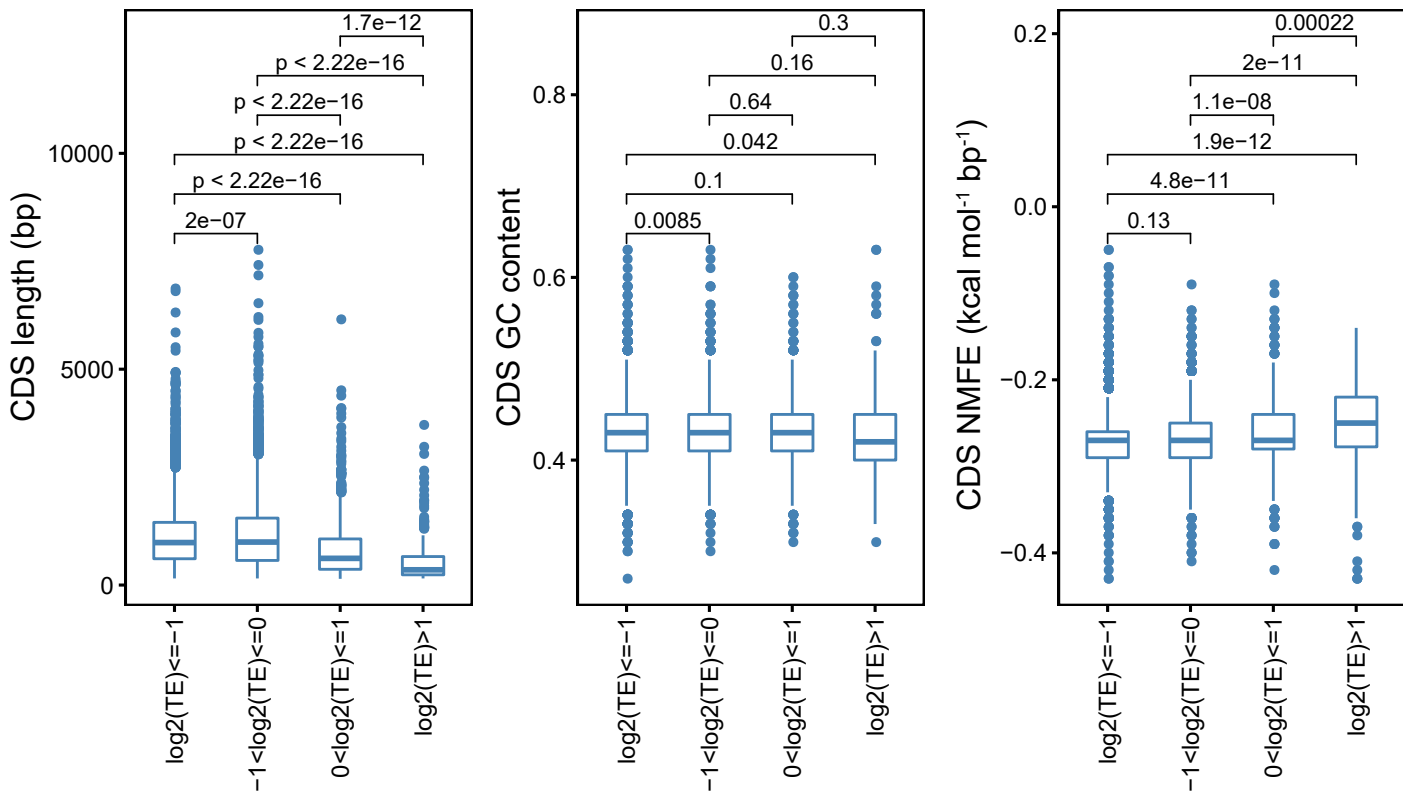

Supplement: s1 [file s1]

a)

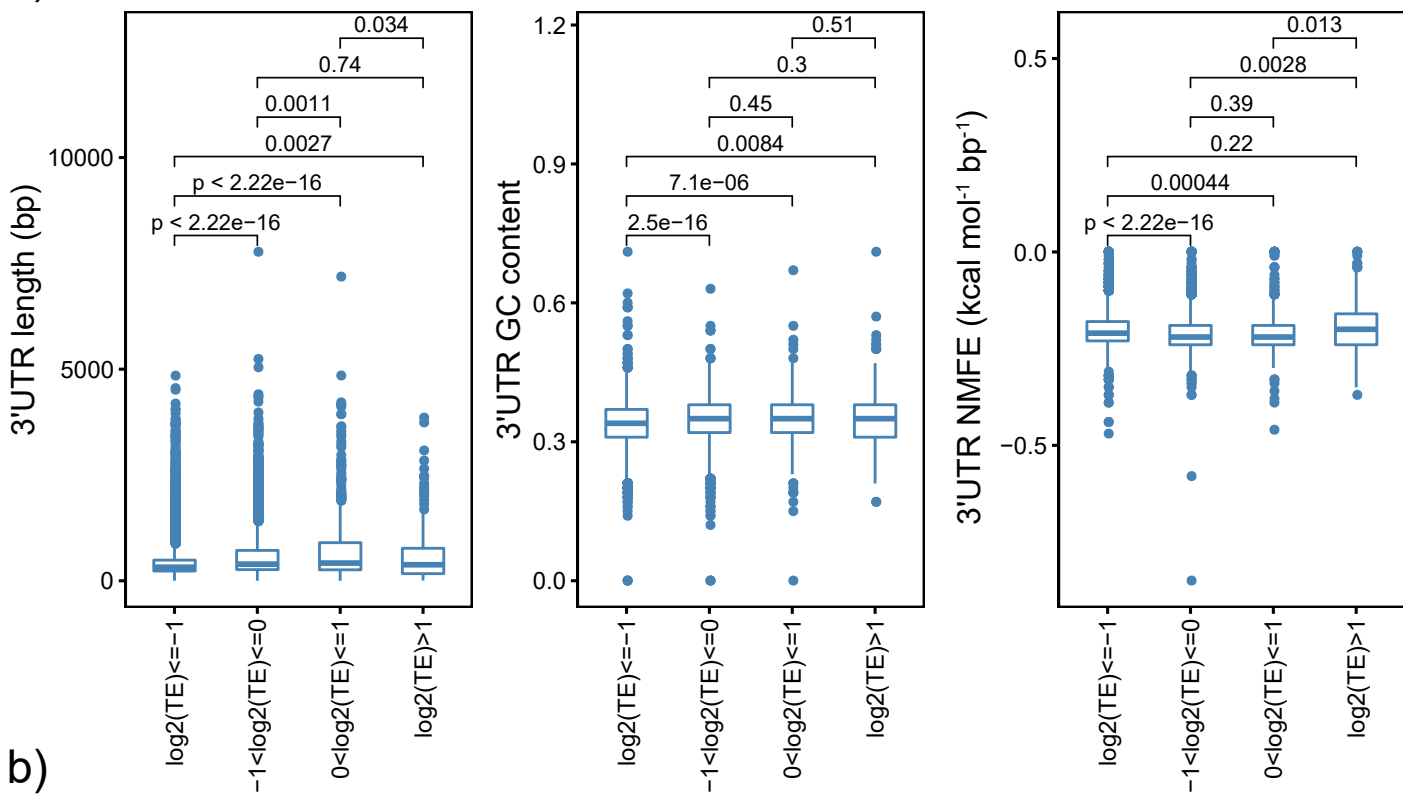

b)

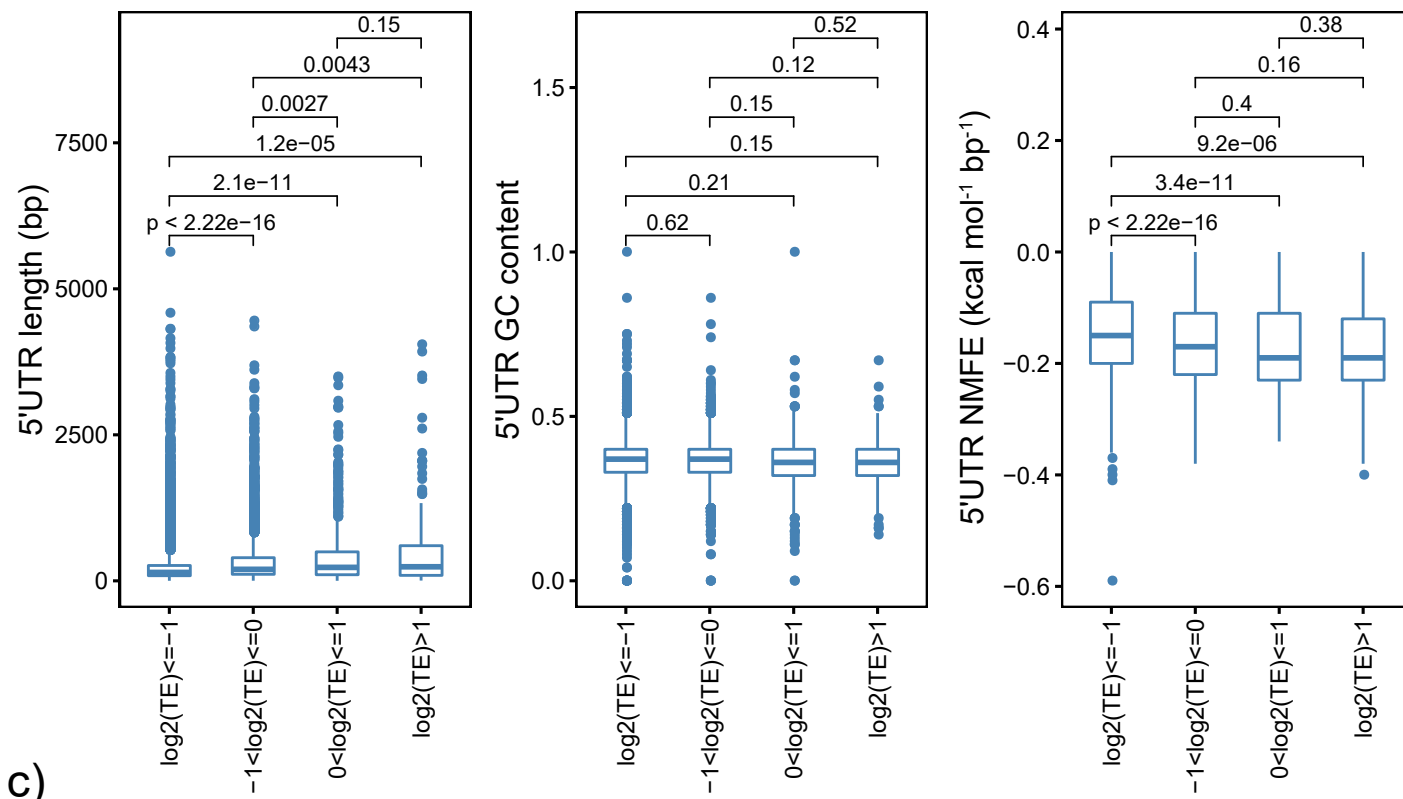

c)

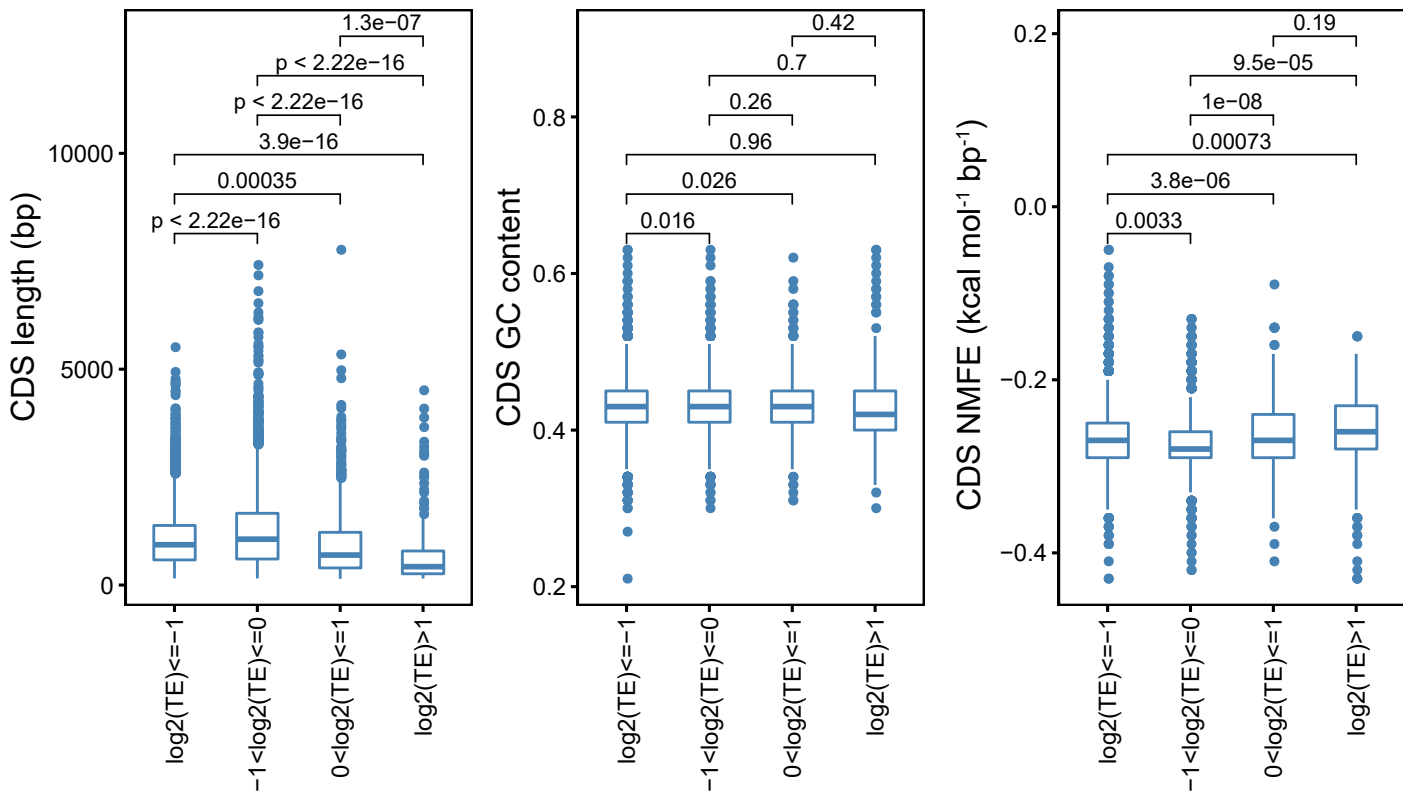

Supplement: s1 [file s1]

a)

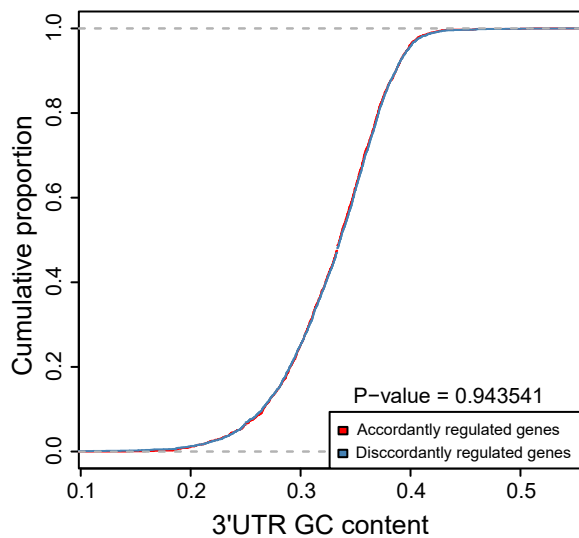

b)

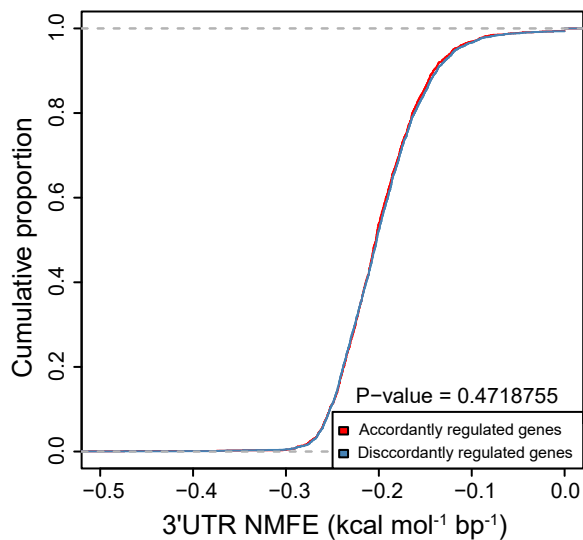

c)

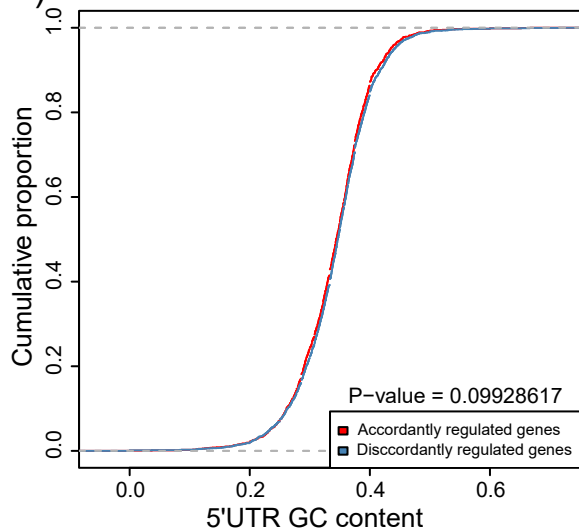

d)

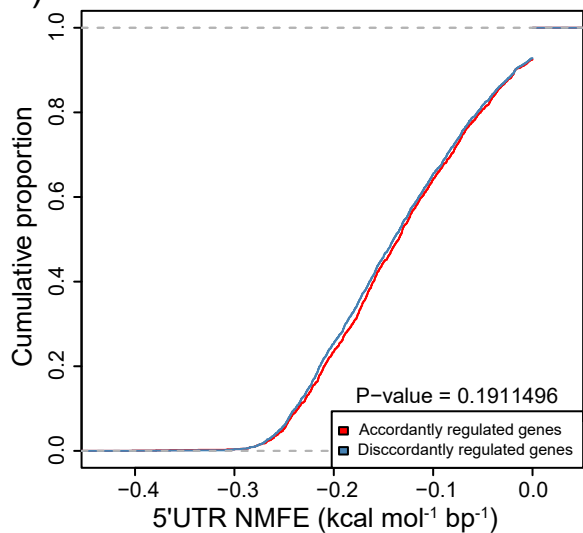

e)

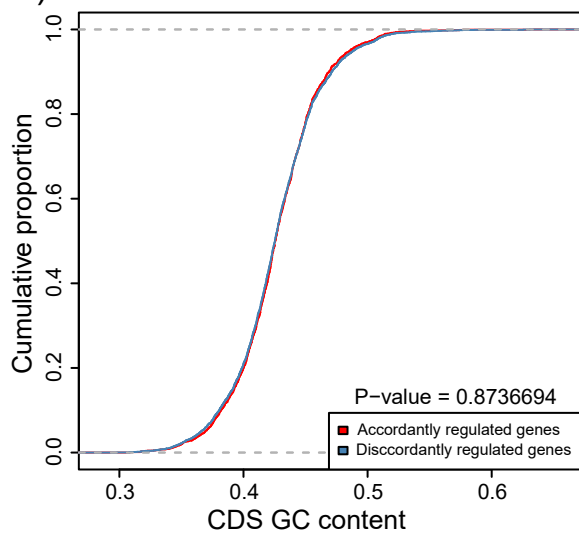

f)

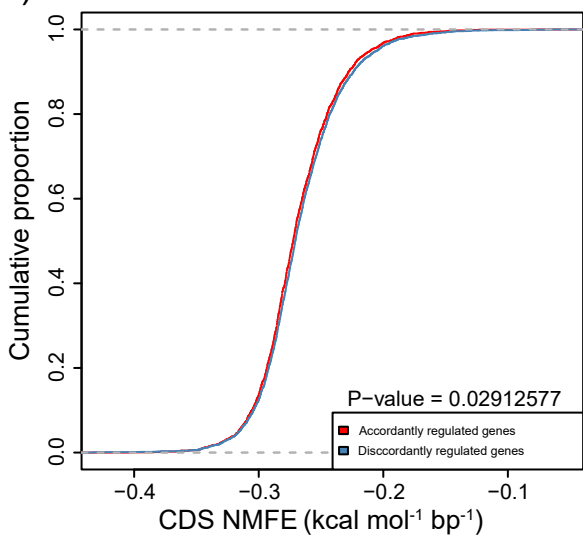

Supplement: s1 [file s1]

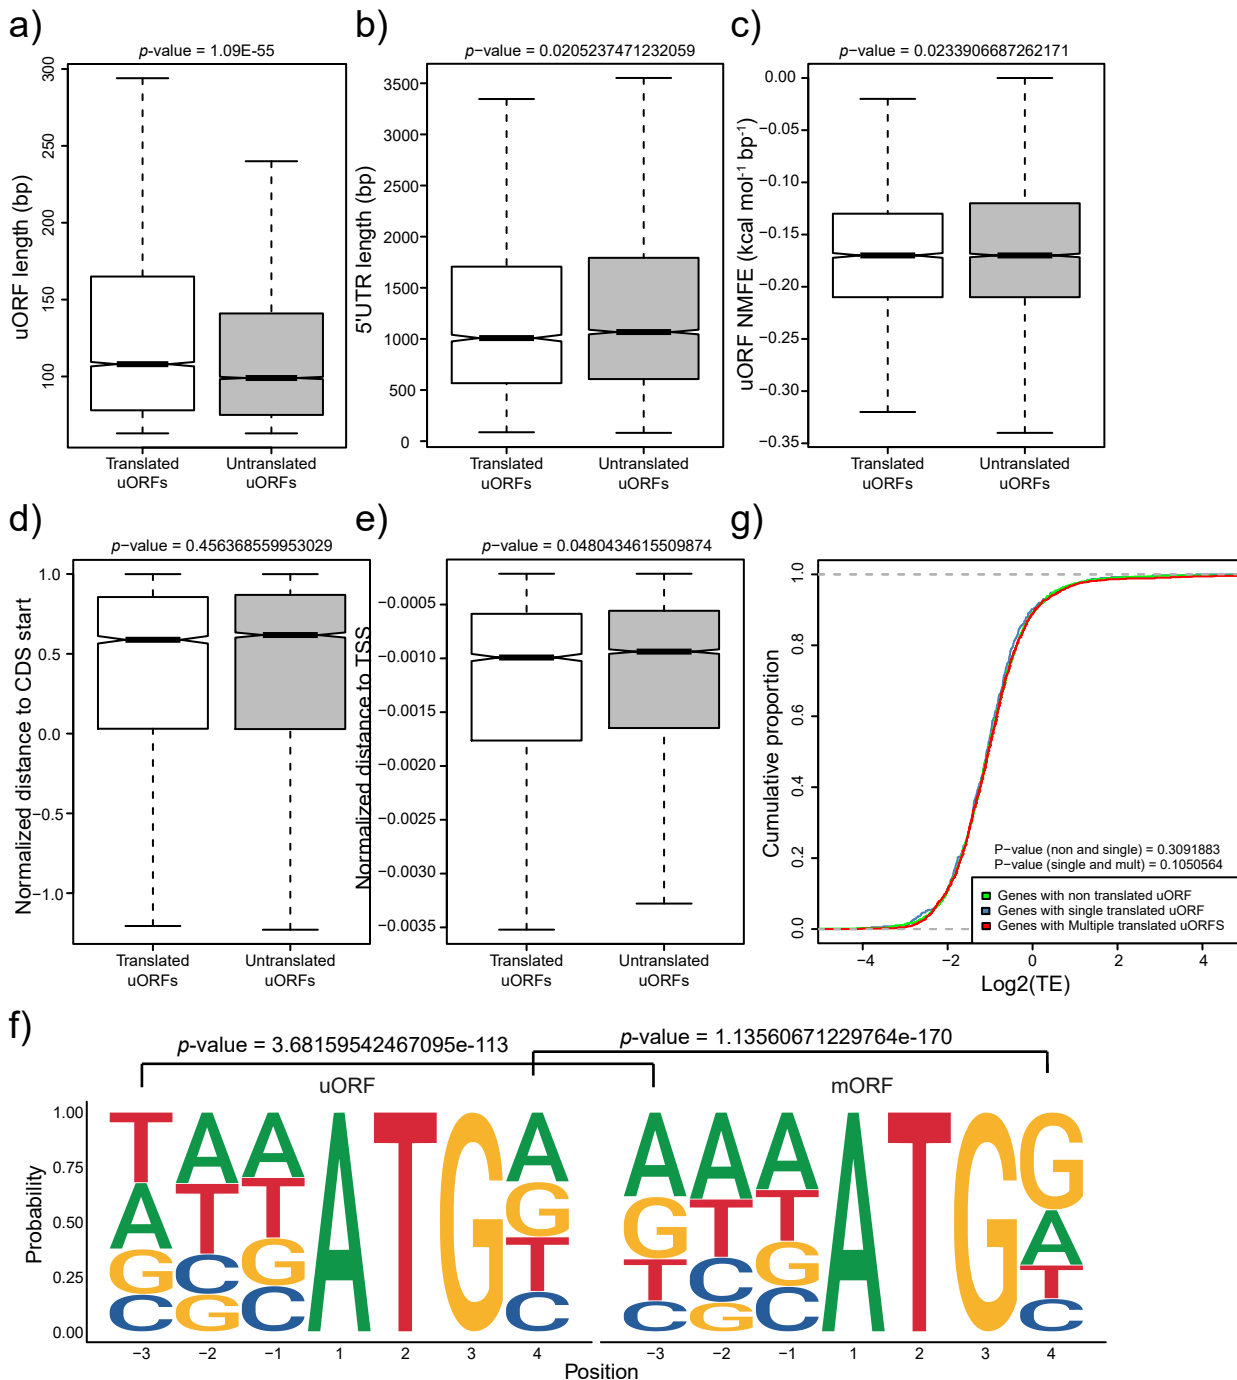

Supplement: s1 [file s1]

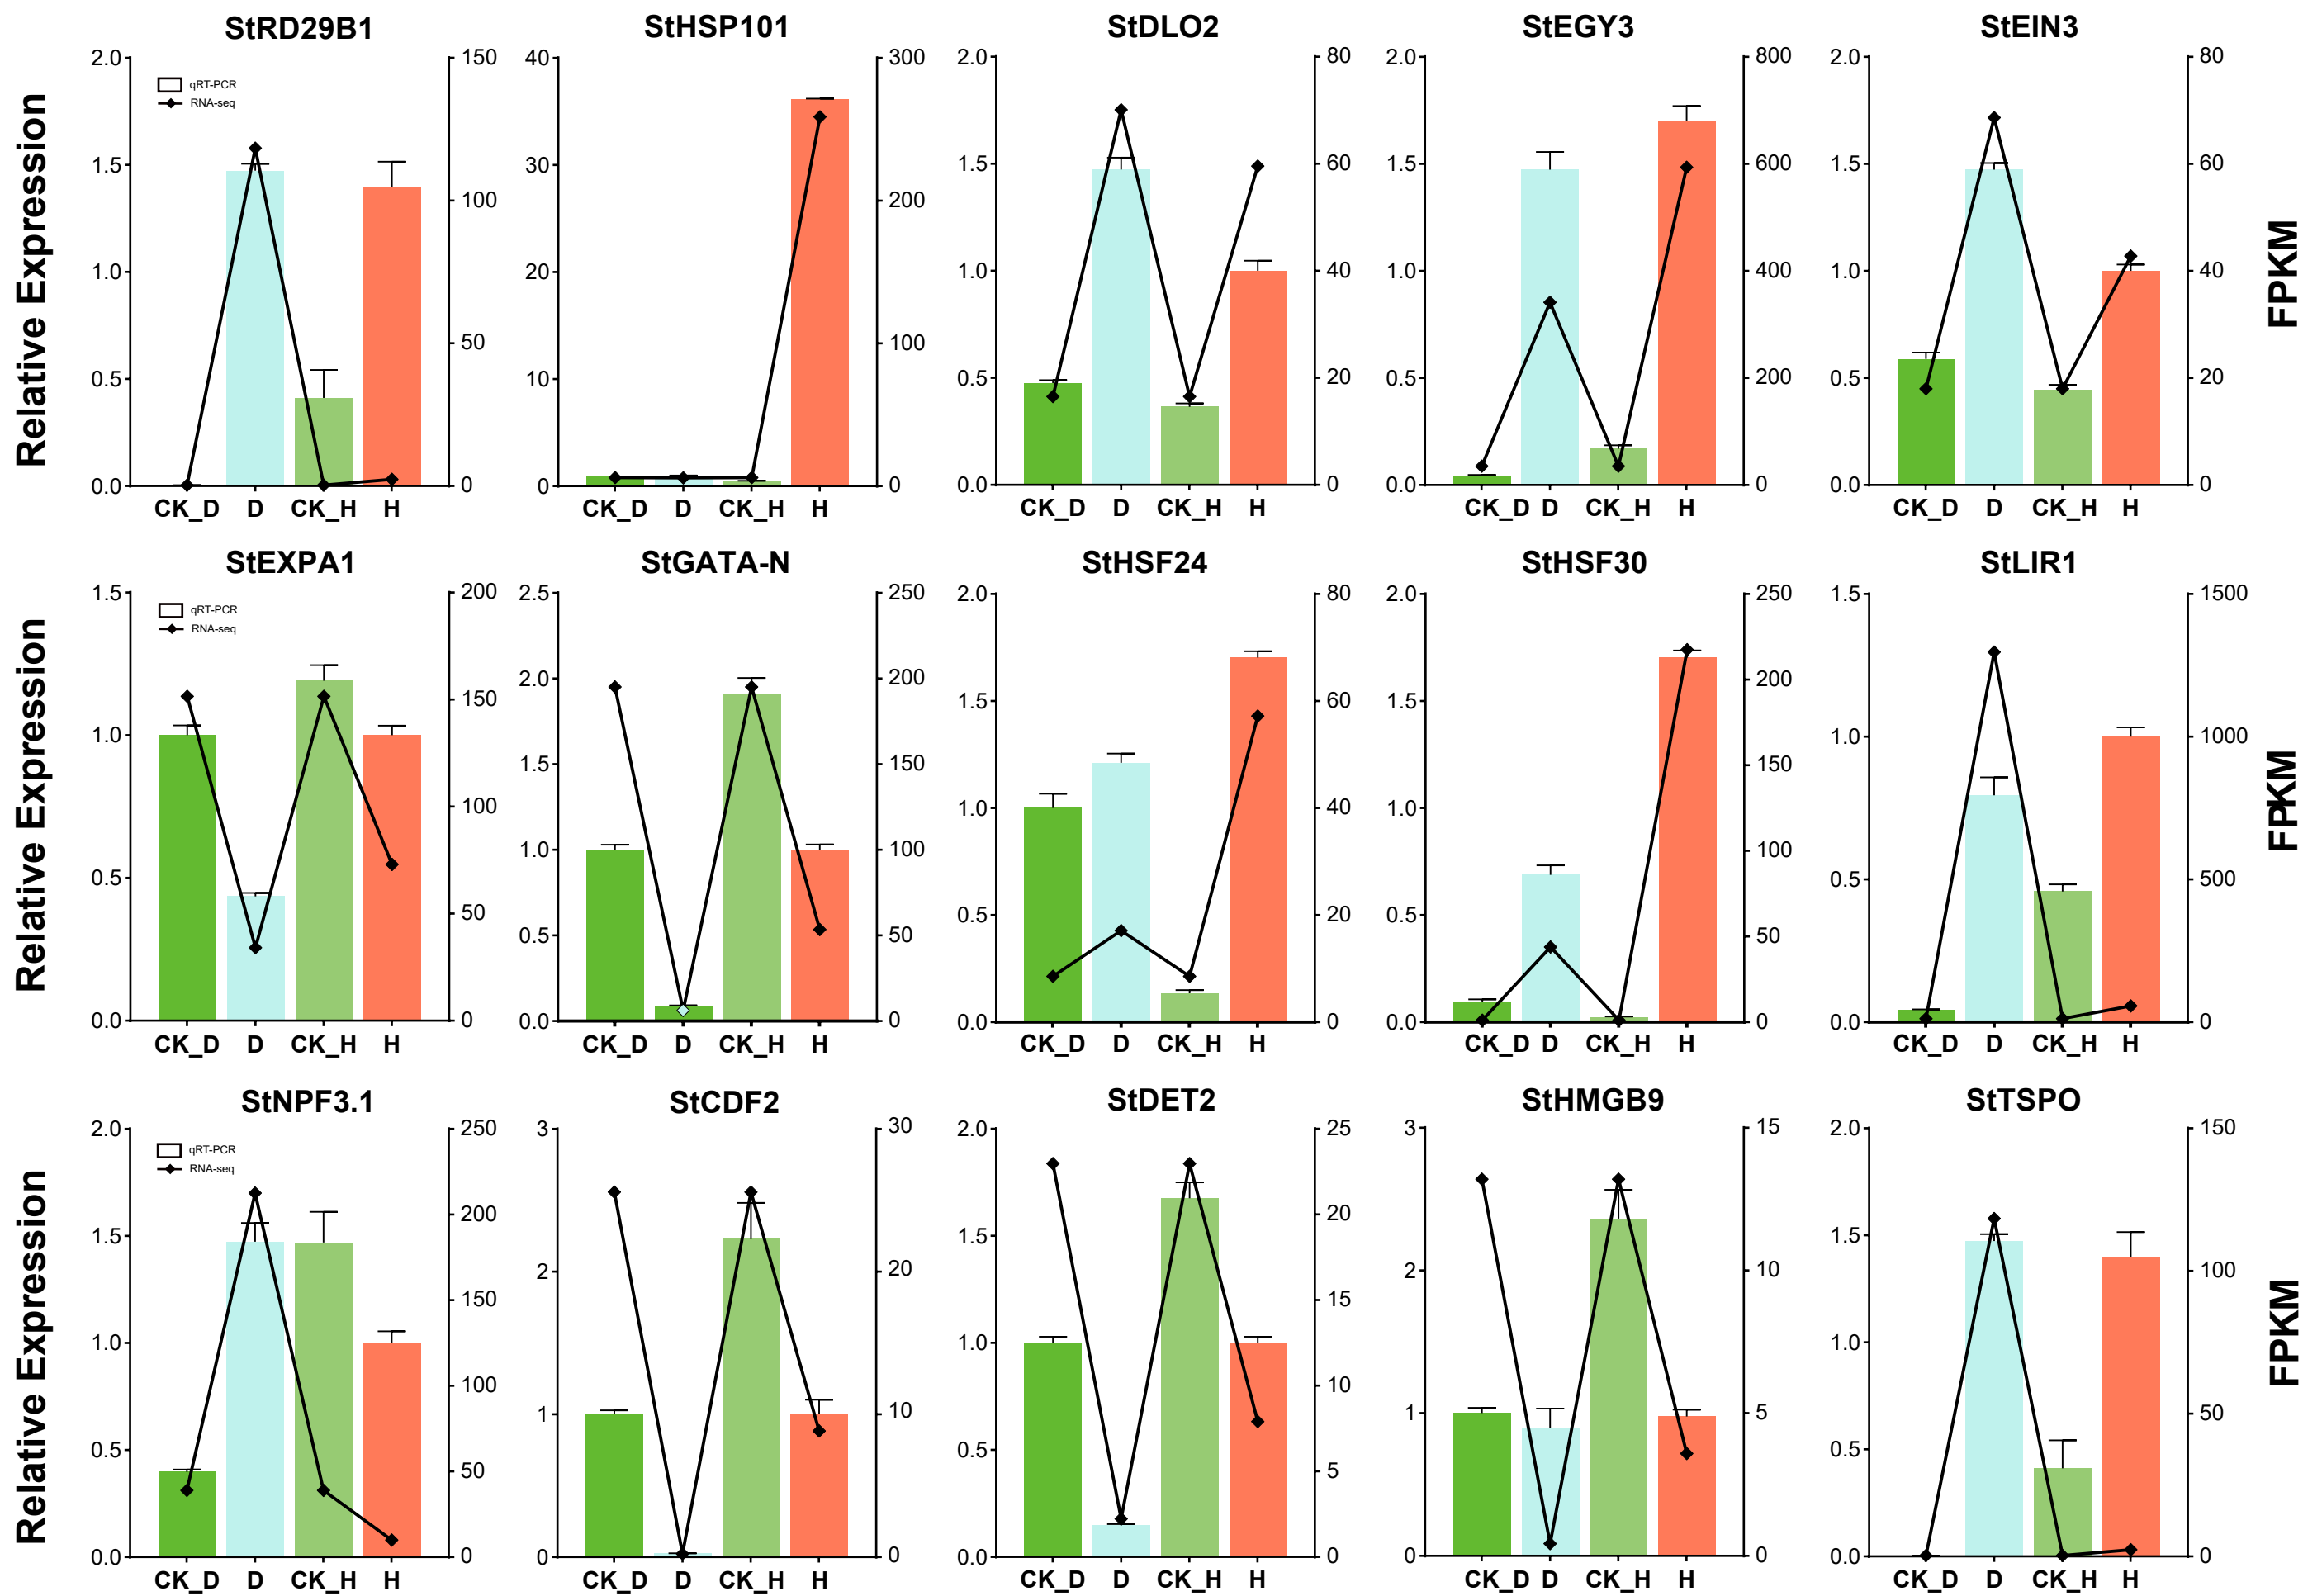

Supplement: s1 [file s1]

35°C 0 h

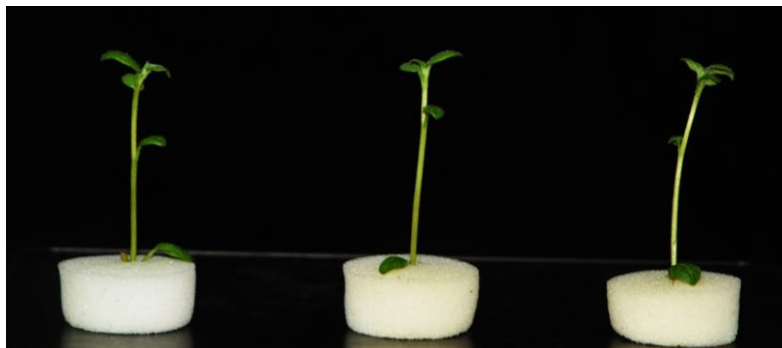

35°C 3 h

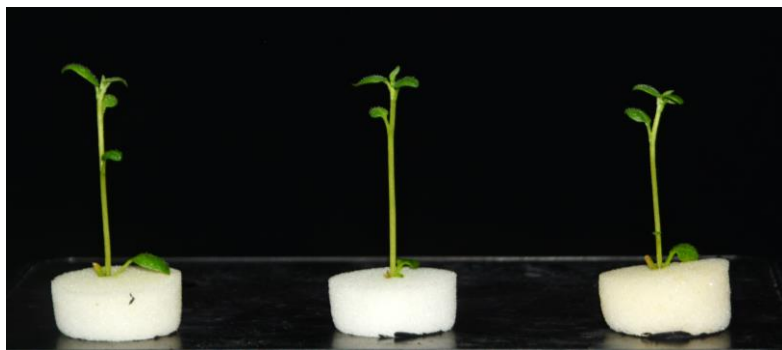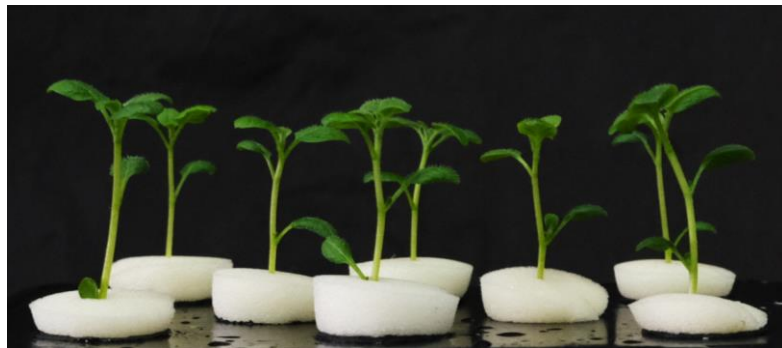

20%PEG6000 0 h

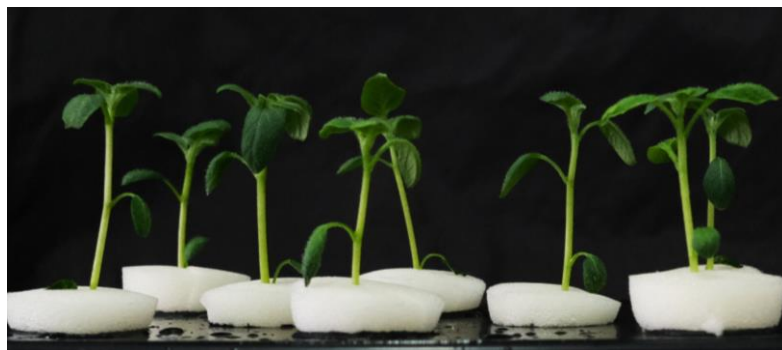

20%PEG6000 3 h

Supplement: s1 [file s1]

a)

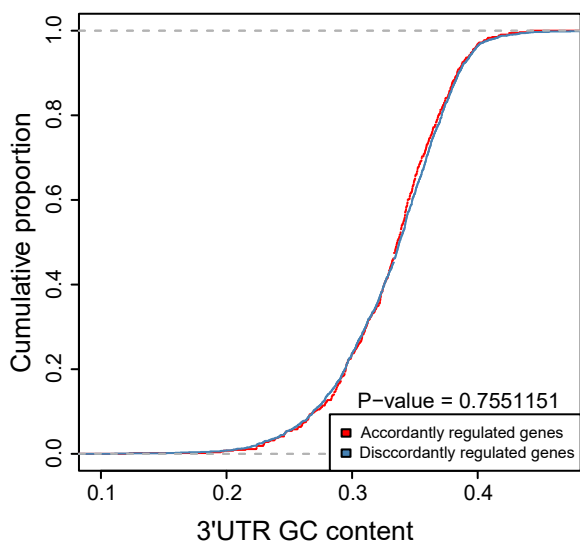

b)

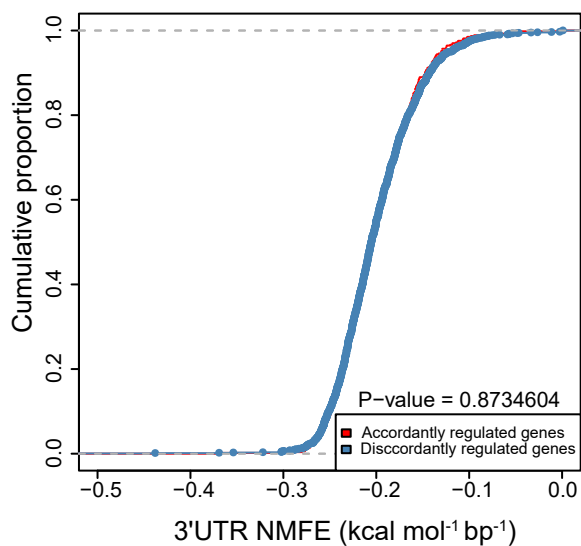

c)

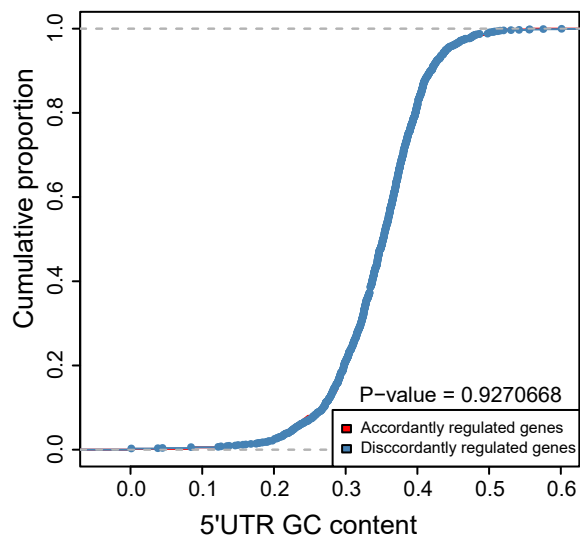

d)

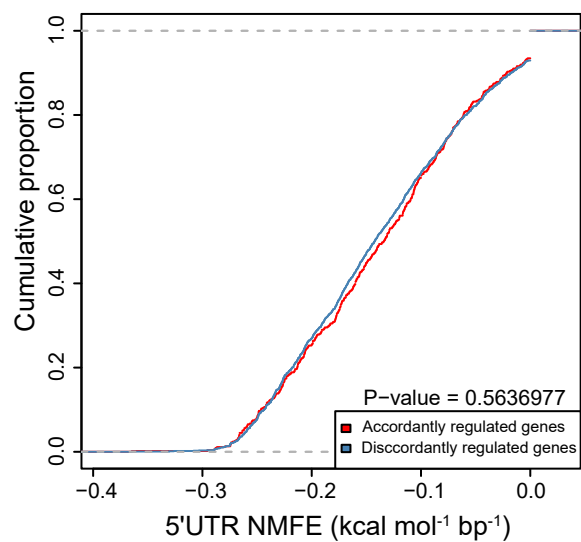

e)

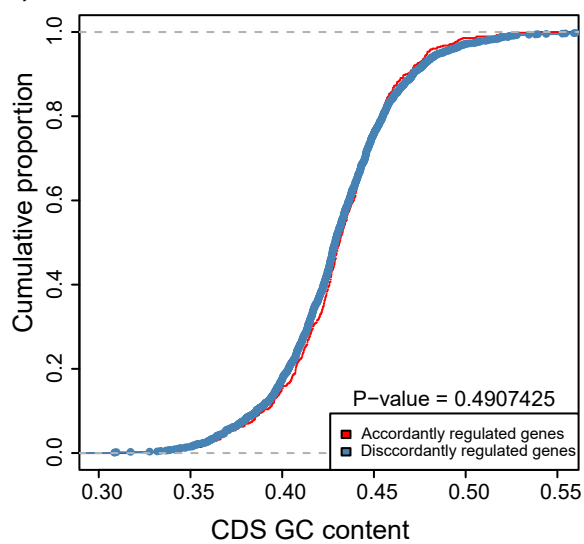

f)

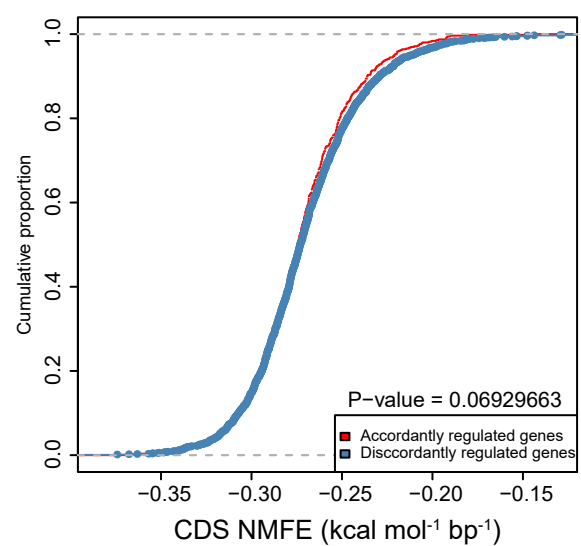

Supplement: s1 [file s1]

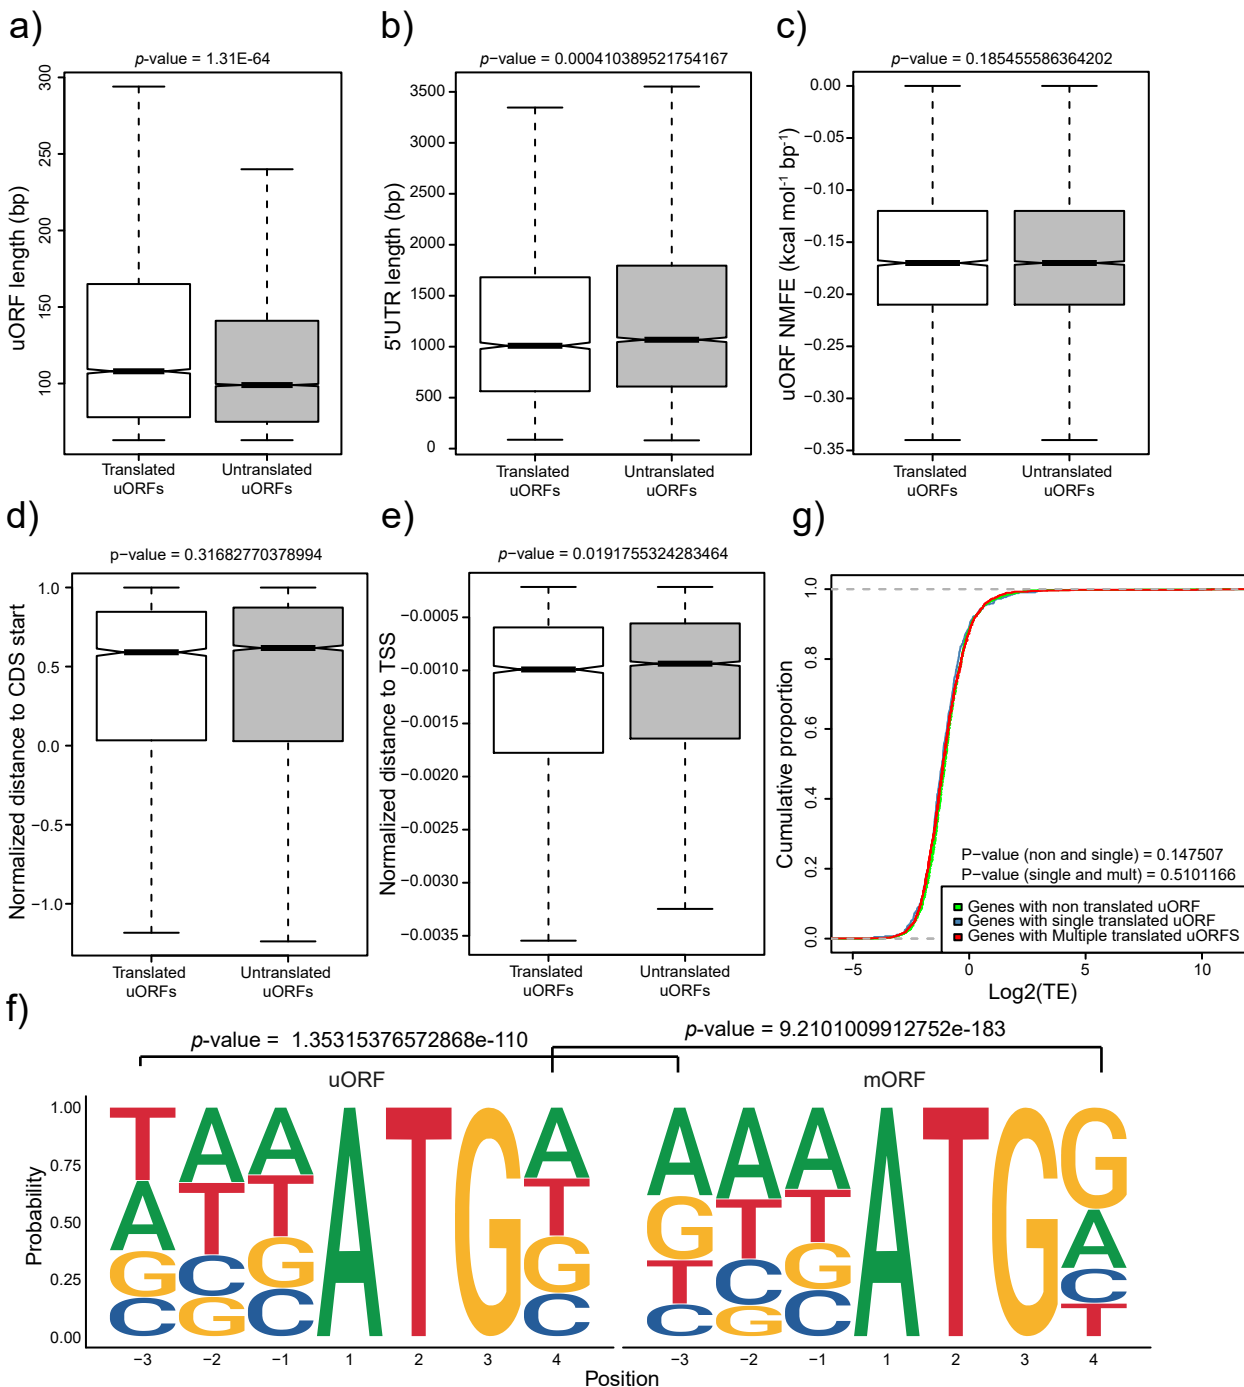

Supplement: s1 [file s1]
